# Supplementary material
Source: ML conference proceedings conference paper supplement (https://proceedings.neurips.cc/paper_files/paper/2010/hash/94f6d7e04a4d452035300f18b984988c-Abstract.html)
Supplement: Supplementary file 1 [file 94f6d7e04a4d452035300f18b984988c-Supplemental.zip]

Archive with 1 entries (1 files):
- extra/NIPS2010_0300_extra.pdf
