# Supplementary material
Source: ML conference proceedings conference paper supplement (https://proceedings.neurips.cc/paper_files/paper/2010/hash/94f6d7e04a4d452035300f18b984988c-Abstract.html)
Supplement: Supplementary file 1 [file 94f6d7e04a4d452035300f18b984988c-Supplemental.zip › extra/NIPS2010_0300_extra.pdf]

---

# Appendix: Cross Species Expression Analysis using a Dirichlet Process Mixture Model with Latent Matchings

---

**Hai-Son Le**  
Machine Learning Department  
Carnegie Mellon University  
Pittsburgh, PA, USA  
hple@cs.cmu.edu

**Ziv Bar-Joseph**  
Machine Learning Department  
Carnegie Mellon University  
Pittsburgh, PA, USA  
zivbj@cs.cmu.edu

## 1 Posterior distribution of $\mu_Y, \Lambda_Y$ :

$$\begin{aligned} \kappa_{Yk} &= \kappa_{Y0} + n_Y & m_Y &= \frac{1}{\kappa_Y}(\kappa_{Y0}m_{Y0} + n_Y\bar{y}) \\ S_Y^{-1} &= S_{Y0}^{-1} + V_Y + \frac{\kappa_{Y0}n_Y}{\kappa_{Y0} + n_Y}(\bar{y} - m_{Y0})(\bar{y} - m_{Y0})^T & \nu_Y &= \nu_{Y0} + n_Y \end{aligned}$$

where  $n_Y = \sum_{i=1}^{n_x} \sum_{j=1}^{n_y} \psi_{i,j,k}$ ,  $\bar{y} = \frac{1}{n_Y} \sum_{i=1}^{n_x} \sum_{j=1}^{n_y} \psi_{i,j,k} y_j$  and  $V_Y = \sum_{i=1}^{n_x} \sum_{j=1}^{n_y} \psi_{i,j,k} (y_j - \bar{y})(y_j - \bar{y})^T$ .

## 2 Data Normalization

As noted in the paper, the biological data was obtained from two previous publications. In both cases the authors have deposited normalized expression values in public databases (Stanford Microarray Database and Gene Expression Omnibus) and we have retrieved these datasets from these public databases. The data was indeed log2 transformed to obtain log ratios for changes vs. control (uninfected cells in both cases). These are standard procedures in microarray analysis and we would include this description in the updated paper. Parameters for BLASTN are based on the NCBI recommendations.

## 3 GO enrichment analysis for clusters inferred by DPMMLM

Table 1, 2, 3 and 4 present the GO enrichment analysis for cluster 2, 3, 4, 5 inferred by DPMMLM.

## 4 GO enrichment analysis for clusters inferred by DPMM

To test whether these differences inferred by the algorithm are biologically meaningful we compared our Dirichlet method to a method that uses deterministic assignments, as was done in the past (DPMM). Using such assignments the algorithm identified only two clusters. Neither of these clusters looked homogenous across species. Table 5 and 6 show the GO enrichment result for the two identified clusters.

| P value     | Corrected P val | GO term description                                                                 | P value     | Corrected P val | GO term description                                                       |
|-------------|-----------------|-------------------------------------------------------------------------------------|-------------|-----------------|---------------------------------------------------------------------------|
| 2.98216e-18 | <0.001          | regulation of transcription, DNA-dependent                                          | 9.80701e-11 | <0.001          | protein binding                                                           |
| 1.58764e-16 | <0.001          | ion binding                                                                         | 1.71813e-10 | <0.001          | hydrogen ion transmembrane transporter activity                           |
| 1.28856e-16 | <0.001          | cation binding                                                                      | 8.76251e-10 | <0.001          | energy coupled proton transport, down electrochemical gradient            |
| 4.81459e-16 | <0.001          | zinc ion binding                                                                    | 8.76251e-10 | <0.001          | ATP synthesis coupled proton transport                                    |
| 5.44663e-14 | <0.001          | regulation of nucleobase, nucleoside, nucleotide and nucleic acid metabolic process | 9.22263e-10 | <0.001          | cytoplasmic part                                                          |
| 8.03482e-14 | <0.001          | DNA binding                                                                         | 1.28684e-09 | <0.001          | ribosome                                                                  |
| 2.06599e-13 | <0.001          | regulation of cellular metabolic process                                            | 1.54800e-09 | <0.001          | monovalent inorganic cation transmembrane transporter activity            |
| 3.71565e-13 | <0.001          | regulation of macromolecule biosynthetic process                                    | 2.13295e-09 | <0.001          | translational elongation                                                  |
| 6.12201e-13 | <0.001          | transcription factor activity                                                       | 5.21561e-09 | <0.001          | proton transport                                                          |
| 6.68339e-13 | <0.001          | regulation of cellular biosynthetic process                                         | 7.45508e-09 | <0.001          | hydrogen transport                                                        |
| 1.06224e-12 | <0.001          | regulation of biosynthetic process                                                  | 9.14840e-09 | <0.001          | ion transmembrane transport                                               |
| 1.45405e-10 | <0.001          | transcription regulator activity                                                    | 1.62098e-08 | <0.001          | structural constituent of ribosome                                        |
| 2.26834e-12 | <0.001          | regulation of metabolic process                                                     | 2.19145e-08 | <0.001          | inorganic cation transmembrane transporter activity                       |
| 4.89572e-12 | <0.001          | intracellular                                                                       | 2.42190e-08 | <0.001          | translation                                                               |
| 7.10911e-12 | <0.001          | regulation of gene expression                                                       | 3.20020e-08 | <0.001          | melanosome                                                                |
| 1.76818e-09 | <0.001          | transmembrane receptor protein tyrosine kinase activity                             | 3.20020e-08 | <0.001          | pigment granule                                                           |
| 2.17270e-09 | <0.001          | transmembrane receptor protein kinase activity                                      | 4.99963e-08 | <0.001          | proton-transporting two-sector ATPase complex, proton-transporting domain |
| 8.56661e-09 | <0.001          | ephrin receptor activity                                                            | 7.22247e-08 | <0.001          | intracellular part                                                        |
| 1.19570e-08 | <0.001          | transmembrane receptor protein tyrosine kinase signaling pathway                    | 5.13700e-08 | <0.001          | cellular process                                                          |
| 1.60773e-07 | <0.001          | cell differentiation                                                                | 2.66531e-07 | 0.001           | ATP biosynthetic process                                                  |

Table 1: The GO enrichment result for cluster 2 identified by DPMMLM.

Table 2: The GO enrichment result for cluster 3 identified by DPMMLM.

| P value     | Corrected P val | GO term description                      |
|-------------|-----------------|------------------------------------------|
| 2.50635e-12 | <0.001          | response to wounding                     |
| 2.20395e-10 | <0.001          | response to stress                       |
| 6.78145e-10 | <0.001          | inflammatory response                    |
| 7.28686e-10 | <0.001          | extracellular space                      |
| 3.81453e-09 | <0.001          | response to chemical stimulus            |
| 6.60775e-09 | <0.001          | extracellular region part                |
| 4.65677e-08 | <0.001          | response to stimulus                     |
| 5.76186e-08 | <0.001          | response to molecule of bacterial origin |
| 1.20234e-07 | <0.001          | fibrillar collagen                       |
| 1.37118e-07 | <0.001          | wound healing                            |
| 1.88215e-07 | <0.001          | platelet-derived growth factor binding   |
| 2.26731e-07 | <0.001          | response to organic substance            |
| 4.44301e-07 | <0.001          | response to lipopolysaccharide           |
| 6.71932e-07 | <0.001          | cytokine activity                        |
| 7.39621e-07 | <0.001          | response to external stimulus            |
| 1.03839e-06 | <0.001          | developmental process                    |
| 1.20286e-06 | 0.001           | skin morphogenesis                       |
| 1.66068e-06 | 0.001           | defense response                         |
| 1.93814e-06 | 0.002           | receptor binding                         |
| 2.15753e-06 | 0.003           | chemotaxis                               |

Table 3: The GO enrichment result for cluster 4 identified by DPMMLM.

| P value     | Corrected P val | GO term description                                  |
|-------------|-----------------|------------------------------------------------------|
| 3.32796e-05 | 0.048           | regulation of receptor biosynthetic process          |
| 2.84188e-06 | 0.007           | positive regulation of receptor biosynthetic process |

Table 4: The GO enrichment result for cluster 5 identified by DPMMLM.

## 5 Discussion

If we use a corrected p-value cutoff of 0.001 we see more than 2 fold increase in the number of significant GO categories that are identified by the DPMMLM method compared to the DPMM method (76 vs. 37 with 19 in the overlap). These include some of the most important categories for these experiments as discussed in the main text (for example, apoptosis).

| P value     | Corrected P val | GO term description                                            |
|-------------|-----------------|----------------------------------------------------------------|
| 5.66587e-13 | <0.001          | protein binding                                                |
| 1.76867e-10 | <0.001          | transcription factor activity                                  |
| 2.23754e-09 | <0.001          | cellular process                                               |
| 5.84677e-09 | <0.001          | biological process                                             |
| 9.88355e-09 | <0.001          | regulation of metabolic process                                |
| 1.17922e-08 | <0.001          | regulation of cellular metabolic process                       |
| 3.15919e-08 | <0.001          | energy coupled proton transport, down electrochemical gradient |
| 3.15919e-08 | <0.001          | ATP synthesis coupled proton transport                         |
| 3.92189e-08 | <0.001          | regulation of cellular process                                 |
| 7.46999e-08 | <0.001          | regulation of biological process                               |

  

| P value     | Corrected P val | GO term description                                     |
|-------------|-----------------|---------------------------------------------------------|
| 7.03858e-16 | <0.001          | response to stress                                      |
| 6.86006e-13 | <0.001          | inflammatory response                                   |
| 1.64180e-10 | <0.001          | immune system process                                   |
| 2.74539e-10 | <0.001          | immune response                                         |
| 9.16024e-10 | <0.001          | response to molecule of bacterial origin                |
| 4.69286e-09 | <0.001          | cytokine activity                                       |
| 2.77866e-08 | <0.001          | receptor binding                                        |
| 3.16405e-08 | <0.001          | transmembrane receptor protein tyrosine kinase activity |
| 3.46386e-08 | <0.001          | cytokine receptor binding                               |
| 4.01148e-08 | <0.001          | extracellular space                                     |
| 4.87151e-09 | <0.001          | defense response                                        |
| 5.40508e-09 | <0.001          | enzyme linked receptor protein signaling pathway        |
| 7.83185e-08 | <0.001          | G-protein-coupled receptor binding                      |
| 8.13866e-09 | <0.001          | chemotaxis                                              |
| 8.96811e-09 | <0.001          | cell communication                                      |
| 1.38699e-07 | <0.001          | protein binding                                         |
| 1.69750e-07 | <0.001          | binding                                                 |
| 2.24898e-07 | <0.001          | regulation of transcription, DNA-dependent              |
| 3.01156e-07 | <0.001          | receptor signaling protein activity                     |
| 3.54444e-07 | <0.001          | regulation of immune system process                     |

Table 5: The GO enrichment result for cluster 1 identified by DPMM.

Table 6: The GO enrichment result for cluster 2 identified by DPMM.
